# Supplementary material for: Chalcogen stabilized trimetallic clusters: synthesis, structures, and bonding of [(Cp*M)3(E)6+m(BH)n] (M = Nb or Ta; E = S or Se;m= 0 or 1 or 2;n= 0 or 1)
Source: Royal Society of Chemistry journal article supplement (doi:10.1039/c8dt05061a), 2019-01-01
Supplement: c8dt05061a1.pdf [file c8dt05061a1.pdf]

**Chalcogen stabilized trimetallic clusters: synthesis, structures, and bonding of  
[(Cp\**M*)<sub>3</sub>(E)<sub>6+m</sub>(BH)<sub>n</sub>] (M = Nb or Ta; E = S or Se; m = 0 or 1 or 2; n = 0 or 1)**

Sourav Kar,<sup>a</sup> Subhash Bairagi,<sup>a</sup> Koushik Saha,<sup>a</sup> Beesam Raghavendra,<sup>a</sup> and Sundargopal Ghosh<sup>\*a</sup>

<sup>a</sup>Department of Chemistry, Indian Institute of Technology Madras, Chennai 600036, India. Tel: +91 44-22574230; Fax: +91 44-22574202; E-mail: [sghosh@iitm.ac.in](mailto:sghosh@iitm.ac.in)

## I Experimental

### I.1 Supplementary Data

|                                                                           | Page No. |
|---------------------------------------------------------------------------|----------|
| Figure S1. Molecular structure and labeling diagram for compound <b>1</b> | S3       |
| Figure S2. Molecular structure and labeling diagram for compound <b>2</b> | S4       |
| Figure S3. Molecular structure and labeling diagram for compound <b>3</b> | S5       |

### I.2 Spectroscopic details

|                                                                             |     |
|-----------------------------------------------------------------------------|-----|
| Figure S4. ESI-MS of compound <b>1</b>                                      | S6  |
| Figure S5. HR-MS of compound <b>1</b>                                       | S7  |
| Figure S6. ESI-MS of compound <b>2</b>                                      | S8  |
| Figure S7. HR-MS of compound <b>2</b>                                       | S9  |
| Figure S8. ESI-MS of compound <b>2</b>                                      | S10 |
| Figure S9. $^1\text{H}\{^{11}\text{B}\}$ NMR spectrum of compound <b>1</b>  | S11 |
| Figure S10. $^{11}\text{B}\{^1\text{H}\}$ NMR spectrum of compound <b>1</b> | S12 |
| Figure S11. $^{13}\text{C}\{^1\text{H}\}$ NMR spectrum of compound <b>1</b> | S13 |
| Figure S12. $^1\text{H}$ NMR spectrum of compound <b>2</b>                  | S14 |
| Figure S13. $^{13}\text{C}\{^1\text{H}\}$ NMR spectrum of compound <b>2</b> | S15 |
| Figure S14. $^1\text{H}$ NMR spectrum of compound <b>3</b>                  | S16 |
| Figure S15. $^{13}\text{C}\{^1\text{H}\}$ NMR spectrum of compound <b>3</b> | S17 |
| Figure S16. IR spectrum of compound <b>1</b>                                | S17 |

## II Computational

### Supplementary data

|                                                                                                                                                                                                                                                                                                                                   |     |
|-----------------------------------------------------------------------------------------------------------------------------------------------------------------------------------------------------------------------------------------------------------------------------------------------------------------------------------|-----|
| Table S1. Calculated natural charges ( $q_M$ , $q_E$ , and $q_B$ ), natural valence population ( <b>Pop</b> ) and HOMO – LUMO gaps of <b>1</b> , <b>2</b> , <b>2<sup>Se</sup></b> , <b>4<sup>S</sup></b> , <b>4</b> , and <b>3</b> . The transition metal and chalcogen atoms are indicated by <b>M</b> and <b>E</b> respectively | S18 |
| Table S2. Selected Wiberg bond index (WBI) of <b>1</b>                                                                                                                                                                                                                                                                            | S19 |
| Figure S17. Optimized geometry of <b>1</b>                                                                                                                                                                                                                                                                                        | S20 |
| Figure S18. Optimized geometry of <b>2</b>                                                                                                                                                                                                                                                                                        | S21 |
| Figure S19. Optimized geometry of <b>3</b>                                                                                                                                                                                                                                                                                        | S22 |

## I Experimental

### I.1 Supplementary Data

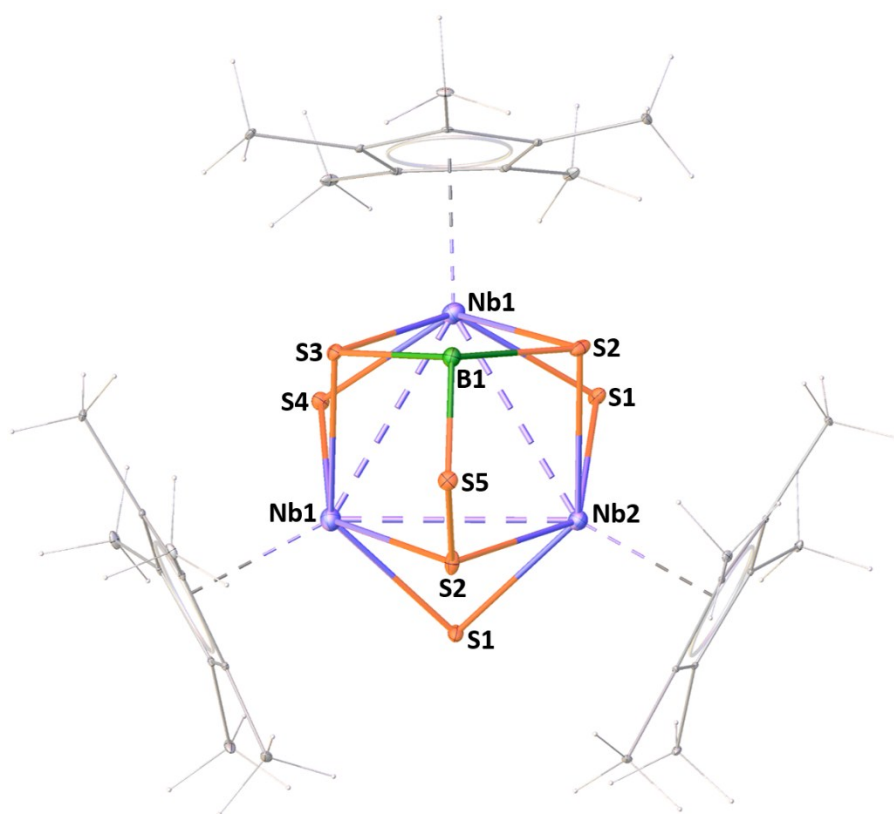

**Figure S1.** Molecular structure and labeling diagram for compound **1**. Selected bond lengths (Å) and bond angles (°) of **1**: Nb1-Nb2 3.1750(9), Nb1-Nb1 3.1390(9), Nb1-S2 2.5514(18), Nb1-S1 2.3840(18), Nb2-S2 2.5337(17), Nb2-S1 2.3837(15), Nb1-S3 2.5336(18), B1-S3 1.937(15), S5-S2 1.941(4), S5-B1 1.880(14), B1-S2 2.086(13); Nb1-Nb2-Nb1 59.25(2), Nb1-Nb1-Nb2 60.373(11), Nb1-S3-Nb1 76.56(6), B1-S5-S2 90.7(4), B1-S3-Nb1 91.7(4).

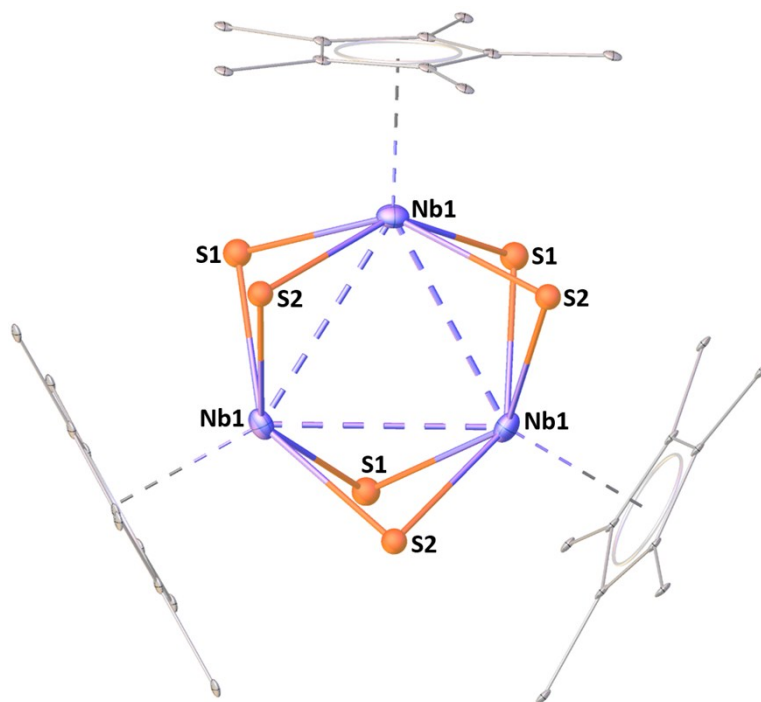

**Figure S2.** Molecular structure and labeling diagram for compound 2.<sup>1</sup>

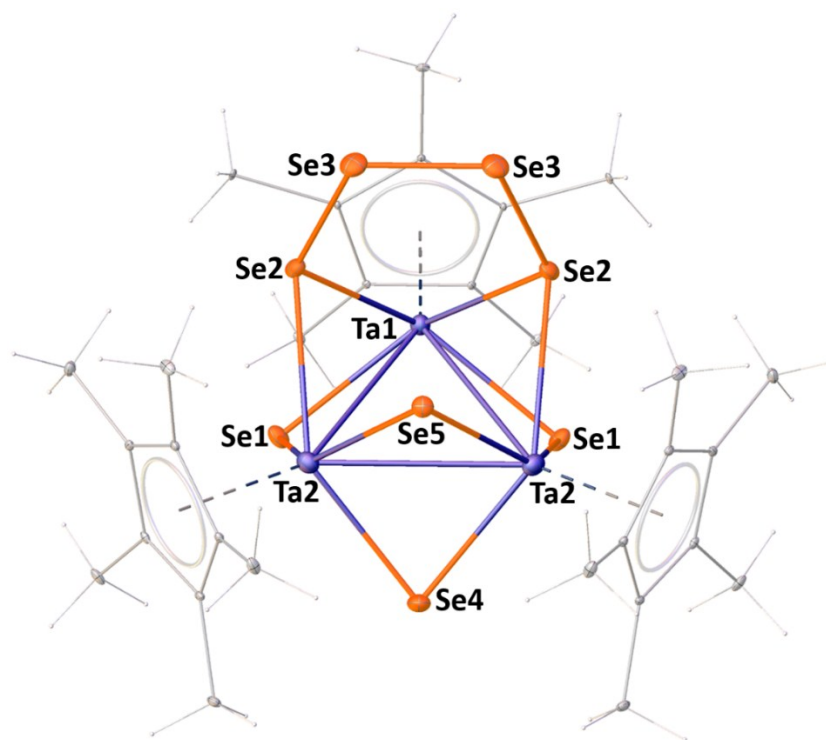

**Figure S3.** Molecular structure and labelling diagram of **3**. Selected bond lengths (Å) and angles (°) of **3**: Ta2-Ta2 3.085(11), Ta1-Ta2 3.3499(9), Se1-Ta1 2.4790(14), Se1-Ta2 2.5488(17) Ta2-Se2 2.7095(13), Ta1-Se2 2.6201(15), Se4-Ta2 2.5045(16), Se5-Ta2 2.5303(16) Se2-Se3 2.248(3), Se3-Se3 1.938(7); Ta2-Se2-Se3 118.33(11), Ta1-Se2-Se3 115.76(11), Ta1-Se2-Ta2 77.86(4), Se3-Se3-Se2 110.03(9), Ta2-Se4-Ta2 76.03(6), Ta2-Se5-Ta2 75.12(6), Ta2-Ta2-Ta1 62.584(12), Ta2-Ta1-Ta2 54.83(2).

## I.2 Spectroscopic details

05122018-04-SGG-NB-HOMO 15 (0.378) AM (Cen,5, 80.00, Ar,5000.0,0.00,1.00); Sb (1,40.00 ); Sm (Mn, 1x5.00); Cm (4:22)

TOF MS ES+  
179

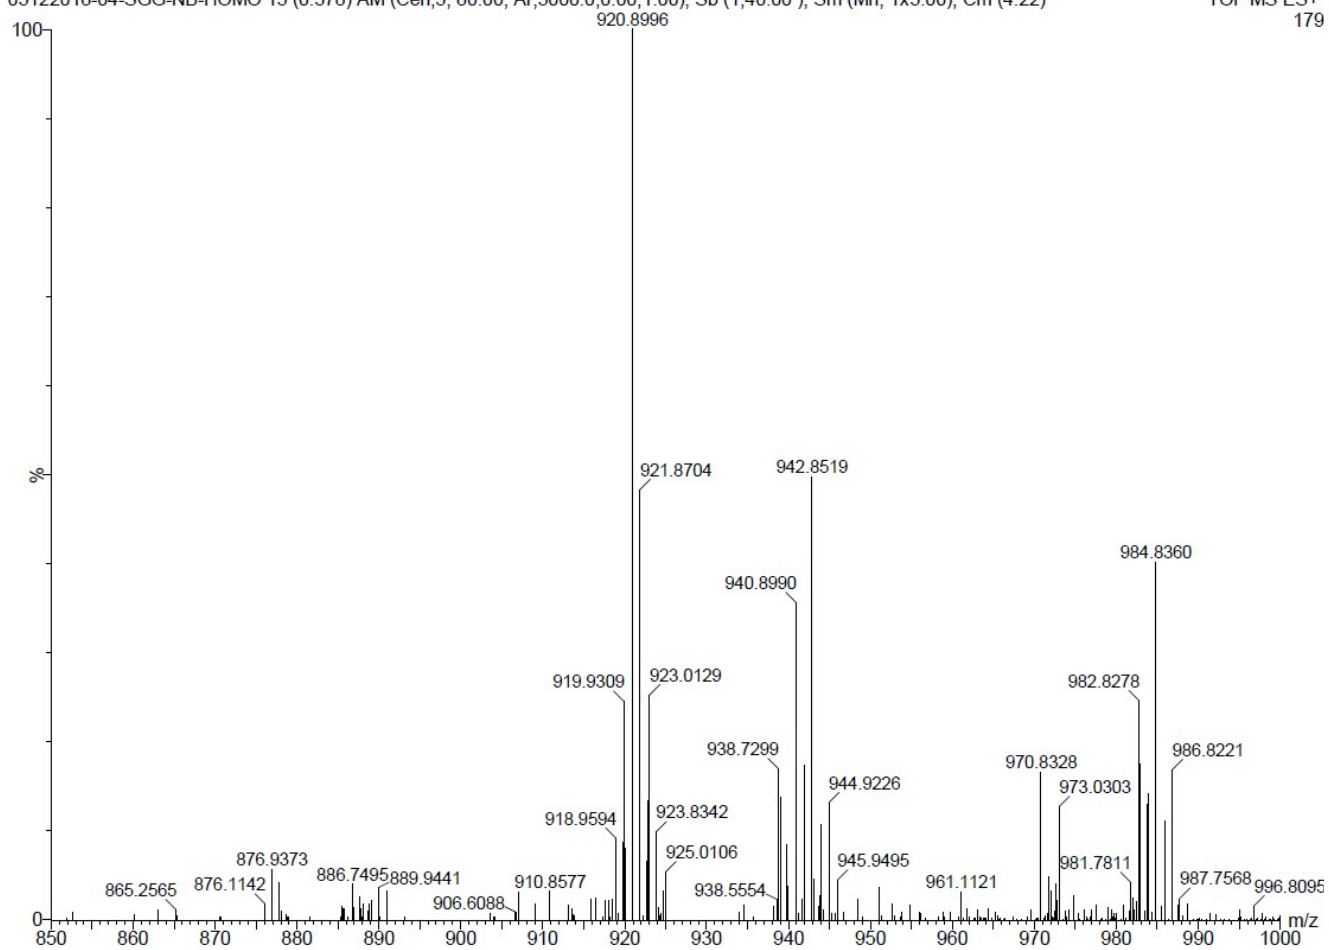

Figure S4. ESI-MS of compound 1

### Single Mass Analysis

Tolerance = 5.0 mDa / DBE: min = -1.5, max = 50.0

Element prediction: Off

Number of isotope peaks used for i-FIT = 3

Monoisotopic Mass, Odd and Even Electron Ions

63 formula(e) evaluated with 1 results within limits (up to 50 best isotopic matches for each mass)

Elements Used:

C: 0-30 H: 0-47 B: 0-1 S: 0-7 Nb: 0-3

SGG-NB-HOMO

05122018-04-SGG-NB-HOMO 15 (0.378) AM (Cen,5, 80.00, Ar,5000.0,0.00,1.00); Sb (1,40.00 ); Sm (Mn, 1x5.00); Cm (4:22)

TOF MS ES+  
1.79e+002

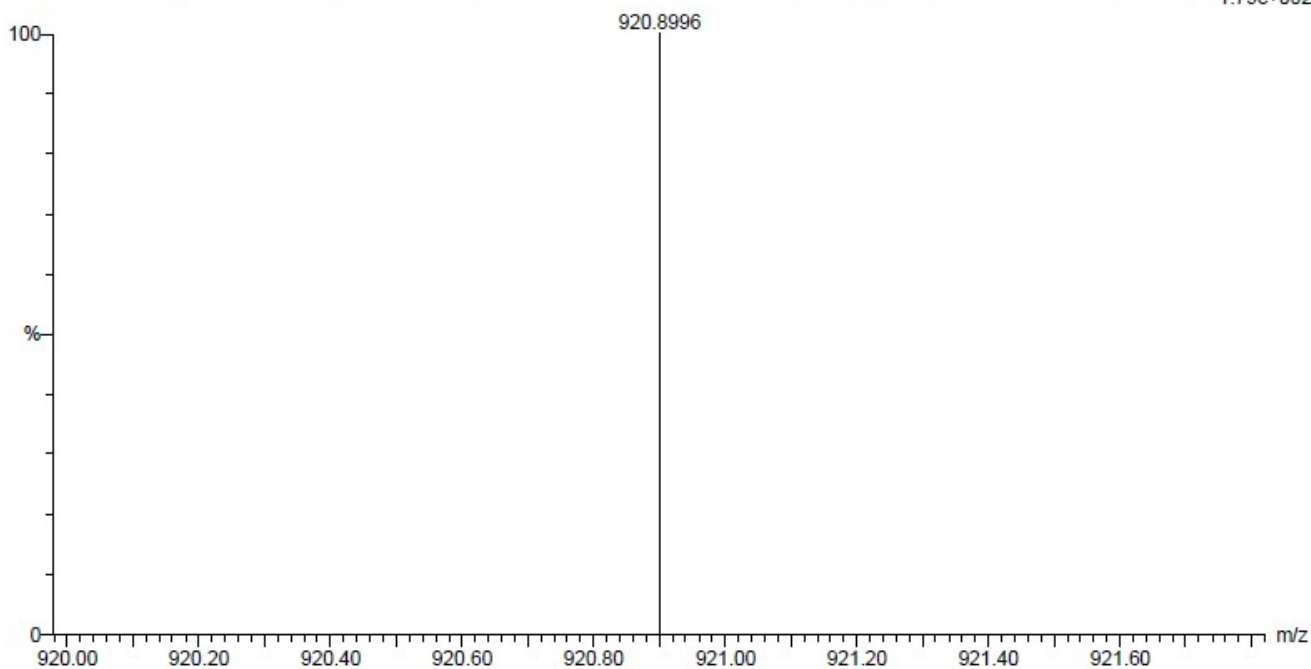

|          |            |      |      |      |       |         |     |   |        |
|----------|------------|------|------|------|-------|---------|-----|---|--------|
| Minimum: |            |      |      | -1.5 |       |         |     |   |        |
| Maximum: |            | 5.0  | 10.0 | 50.0 |       |         |     |   |        |
| Mass     | Calc. Mass | mDa  | PPM  | DBE  | i-FIT | Formula |     |   |        |
| 920.8996 | 920.9007   | -1.1 | -1.2 | 8.0  | n/a   | C30     | H47 | B | S7 Nb3 |

Figure S5. HR-MS of compound 1

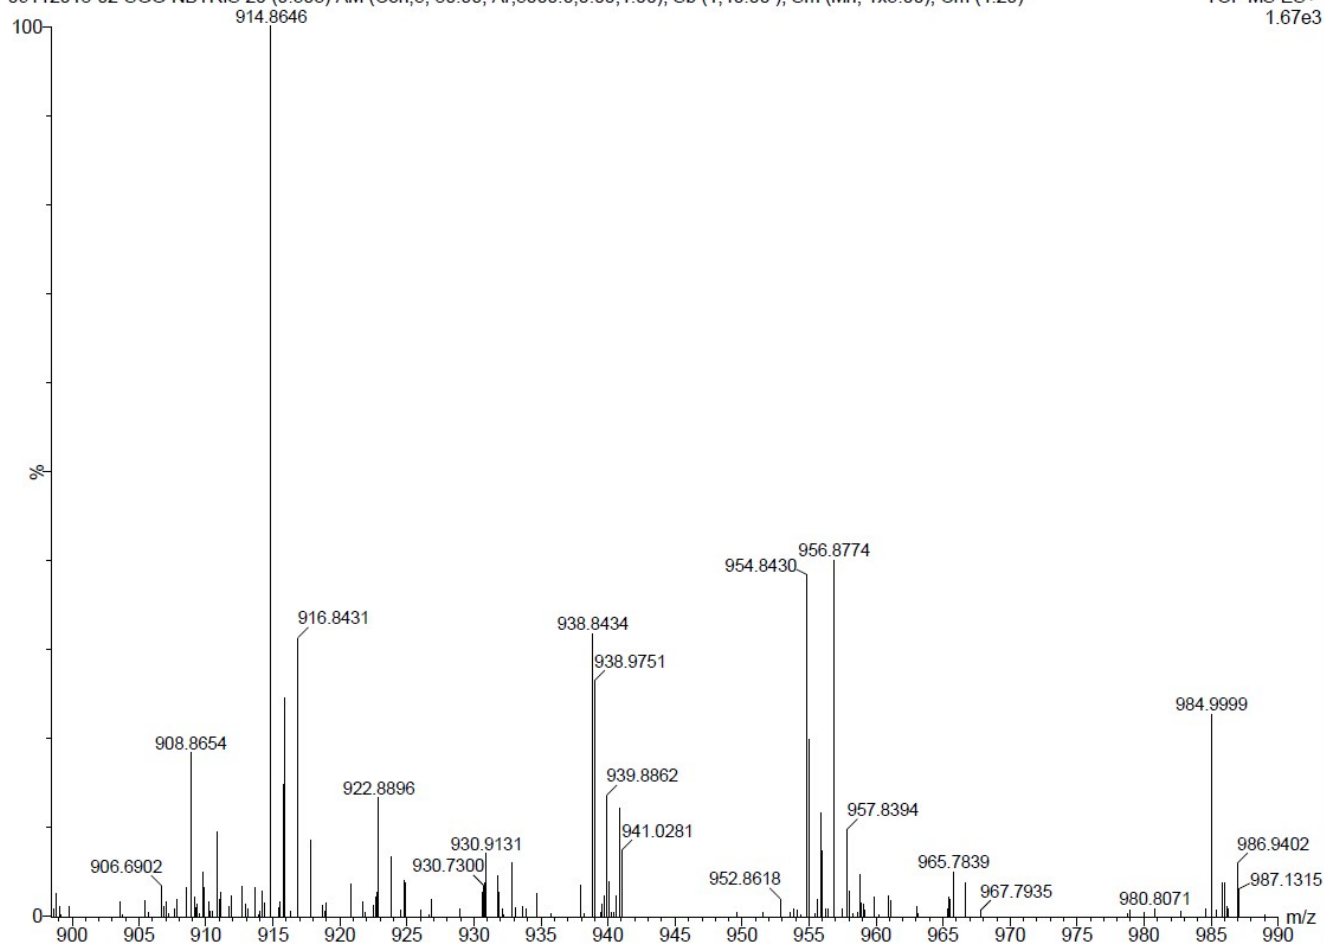

Figure S6. ESI-MS of compound 2



### Single Mass Analysis

Tolerance = 5.0 mDa / DBE: min = -1.5, max = 50.0

Element prediction: Off

Number of isotope peaks used for i-FIT = 3

Monoisotopic Mass, Odd and Even Electron Ions

56 formula(e) evaluated with 1 results within limits (up to 50 best isotopic matches for each mass)

Elements Used:

C: 0-30 H: 0-45 S: 0-6 K: 0-1 Nb: 0-3

SGG-NBTRIS

09112018-02-SGG-NBTRIS 20 (0.503) AM (Cen,5, 80.00, Ar,5000.0,0.00,1.00); Sb (1,40.00 ); Sm (Mn, 1x5.00); Cm (4:20)

TOF MS ES+  
1.67e+003

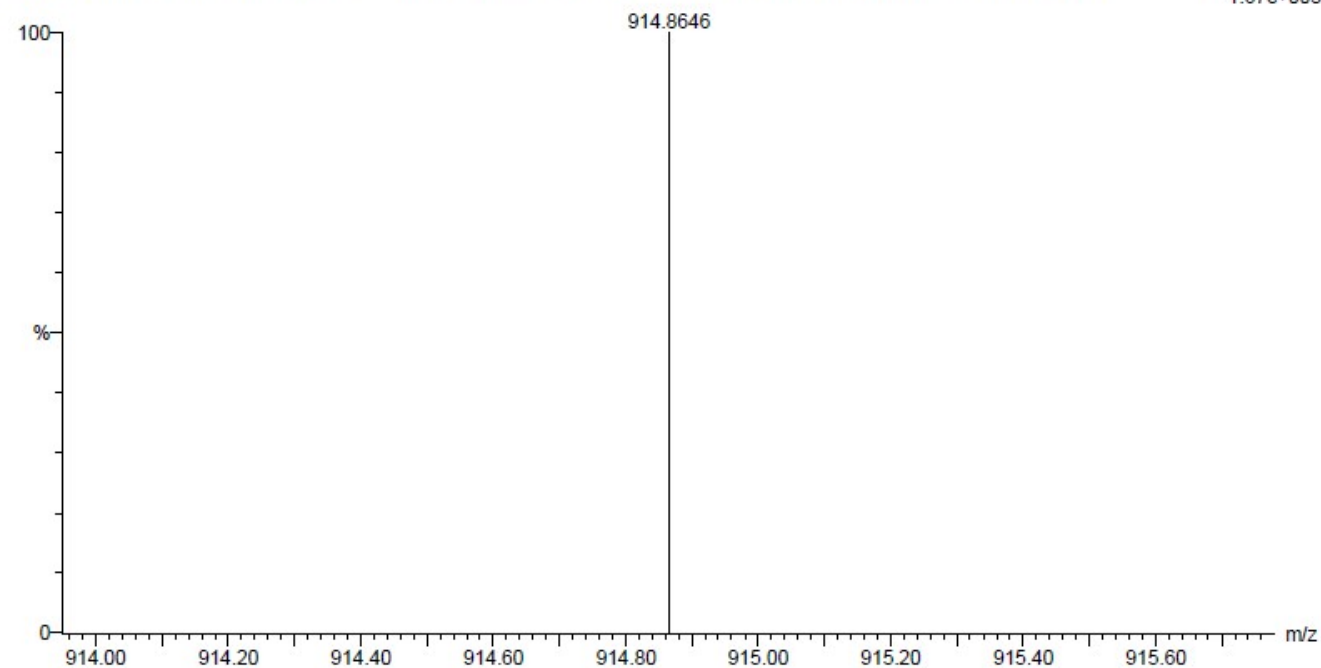

Minimum: -1.5  
Maximum: 5.0 10.0 50.0

| Mass     | Calc. Mass | mDa  | PPM  | DBE | i-FIT | Formula          |
|----------|------------|------|------|-----|-------|------------------|
| 914.8646 | 914.8674   | -2.8 | -3.1 | 8.0 | n/a   | C30 H45 S6 K Nb3 |

Figure S7. HR-MS of compound 2

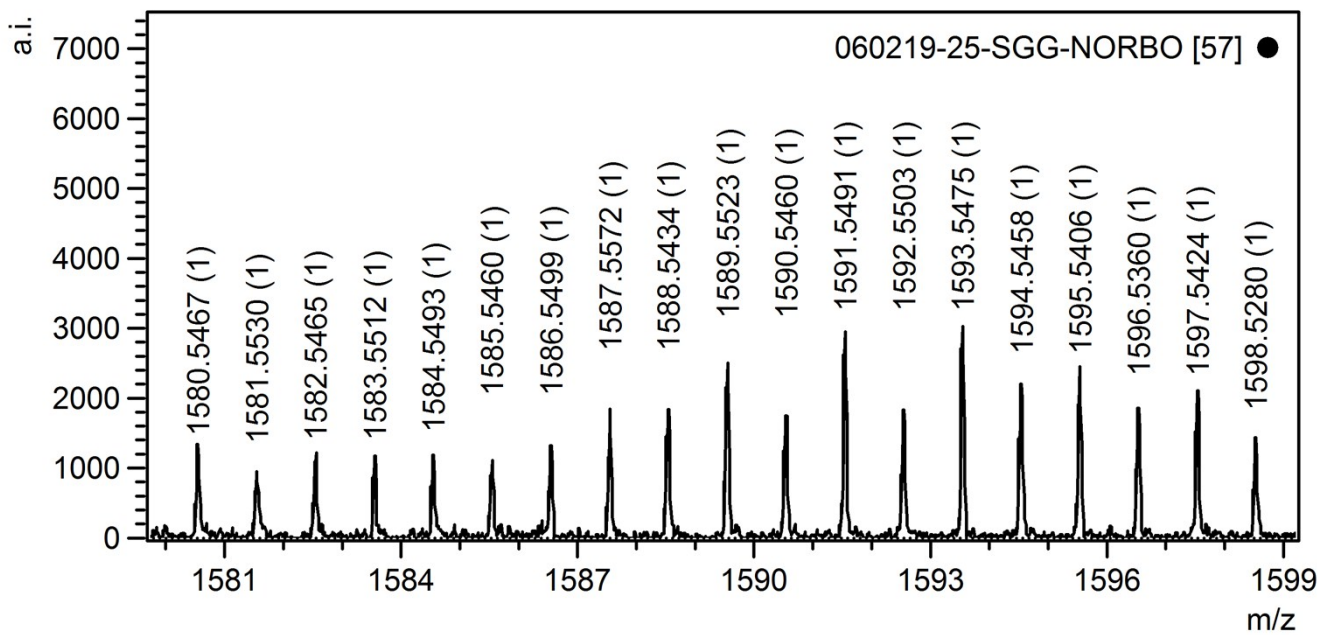

Figure S8. ESI-MS of compound 3

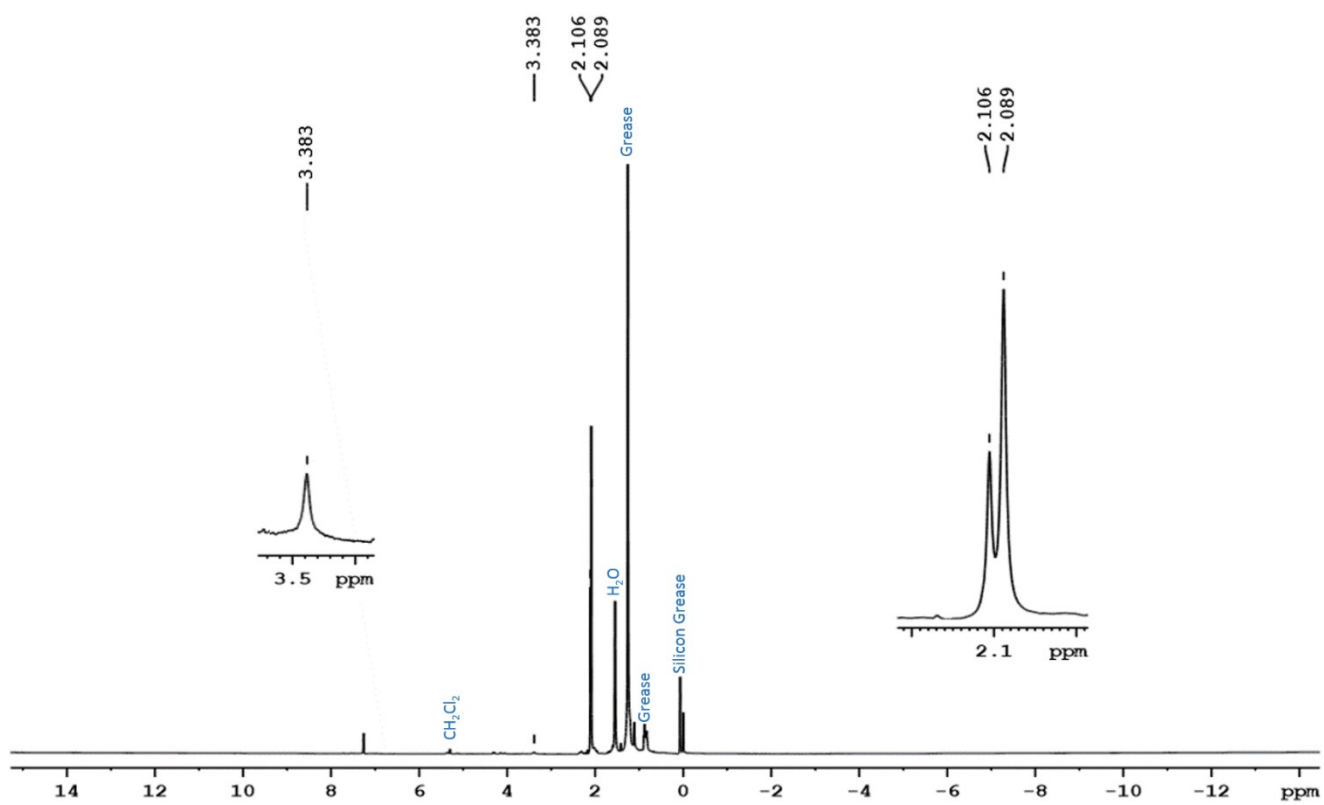

**Figure S9.**  $^1\text{H}\{^{11}\text{B}\}$  NMR spectrum of compound **1** in  $\text{CDCl}_3$

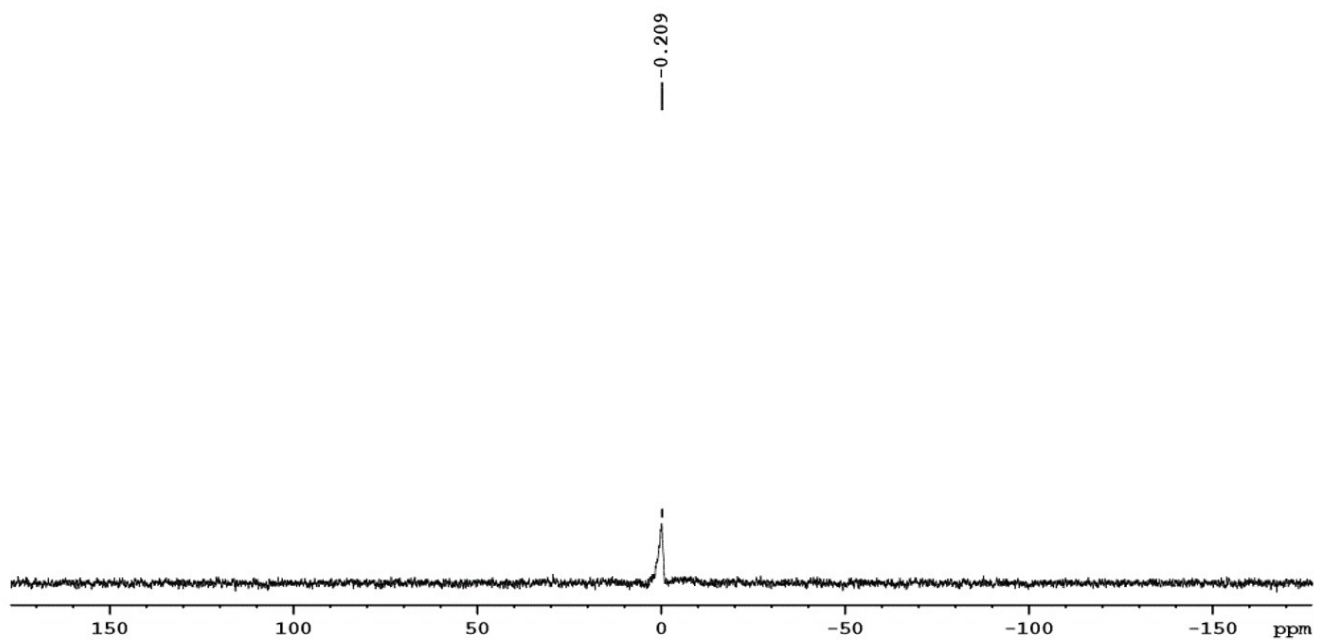

**Figure S10.**  $^{11}\text{B}\{^1\text{H}\}$  NMR spectrum of compound **1** in  $\text{CDCl}_3$ .<sup>2,3</sup>

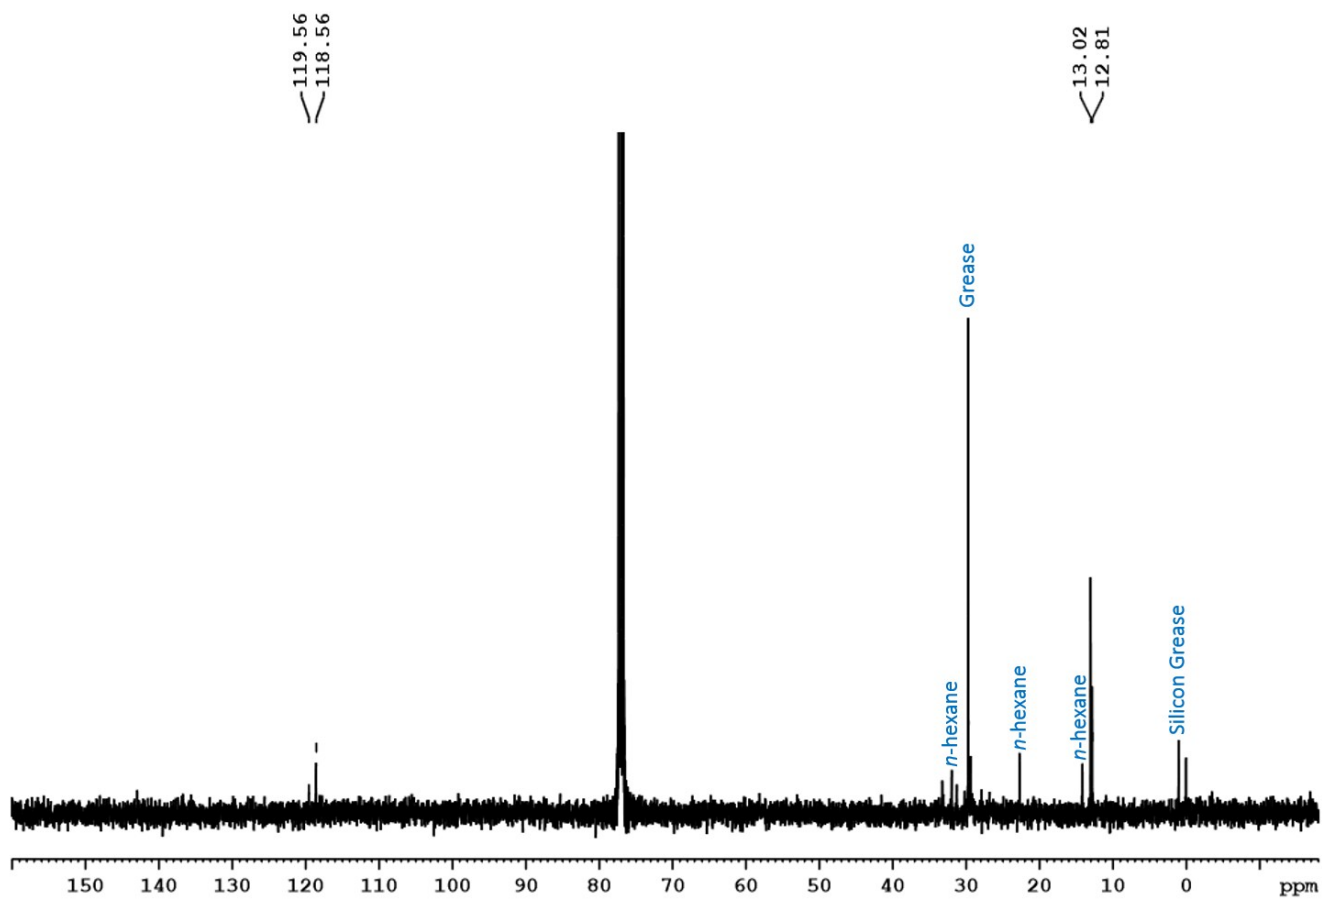

Figure S11.  $^{13}\text{C}\{^1\text{H}\}$  NMR spectrum of compound **1** in  $\text{CDCl}_3$

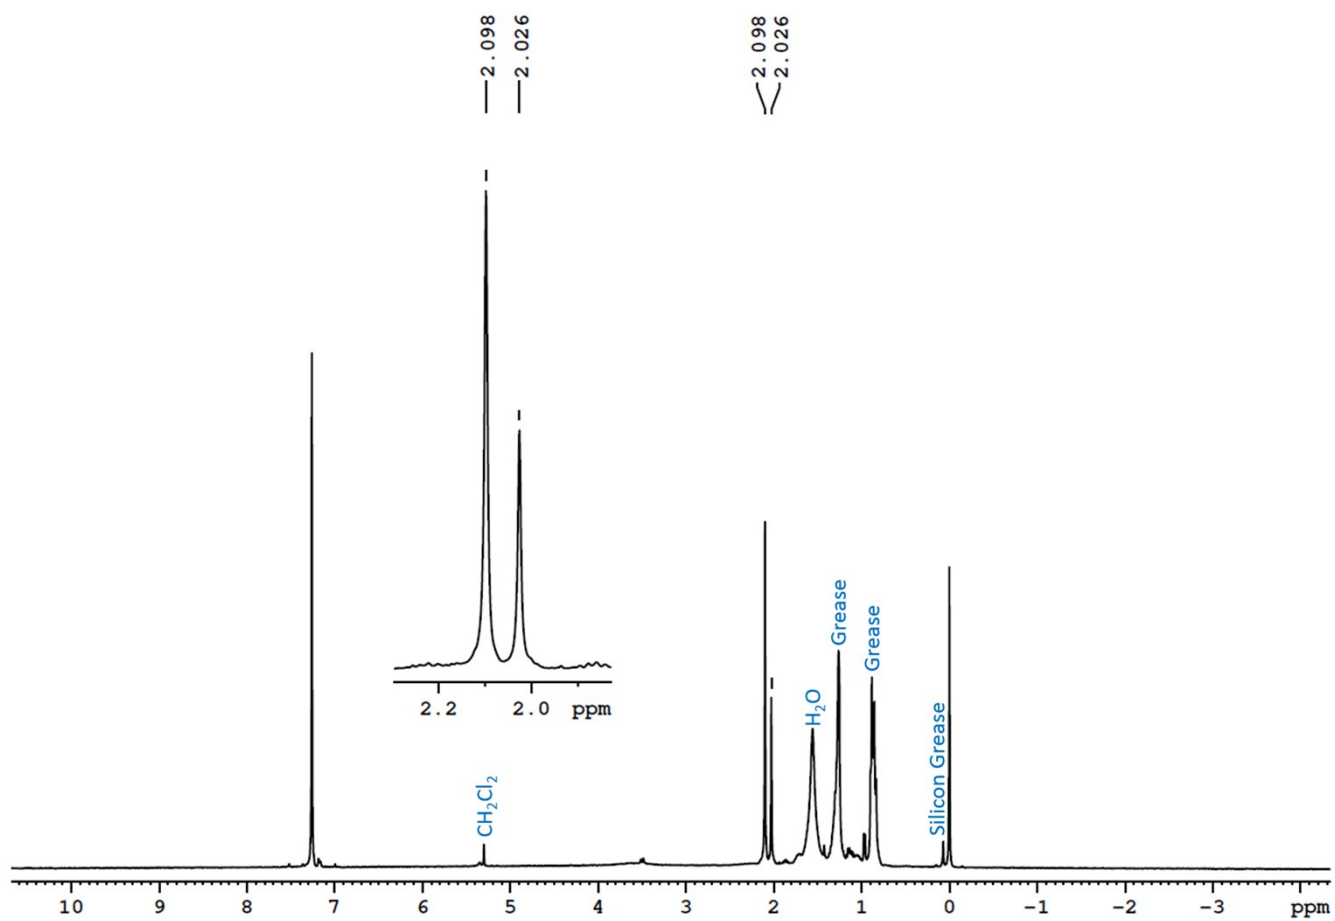

**Figure S12.**  $^1\text{H}$  NMR spectrum of compound **2** in  $\text{CDCl}_3$

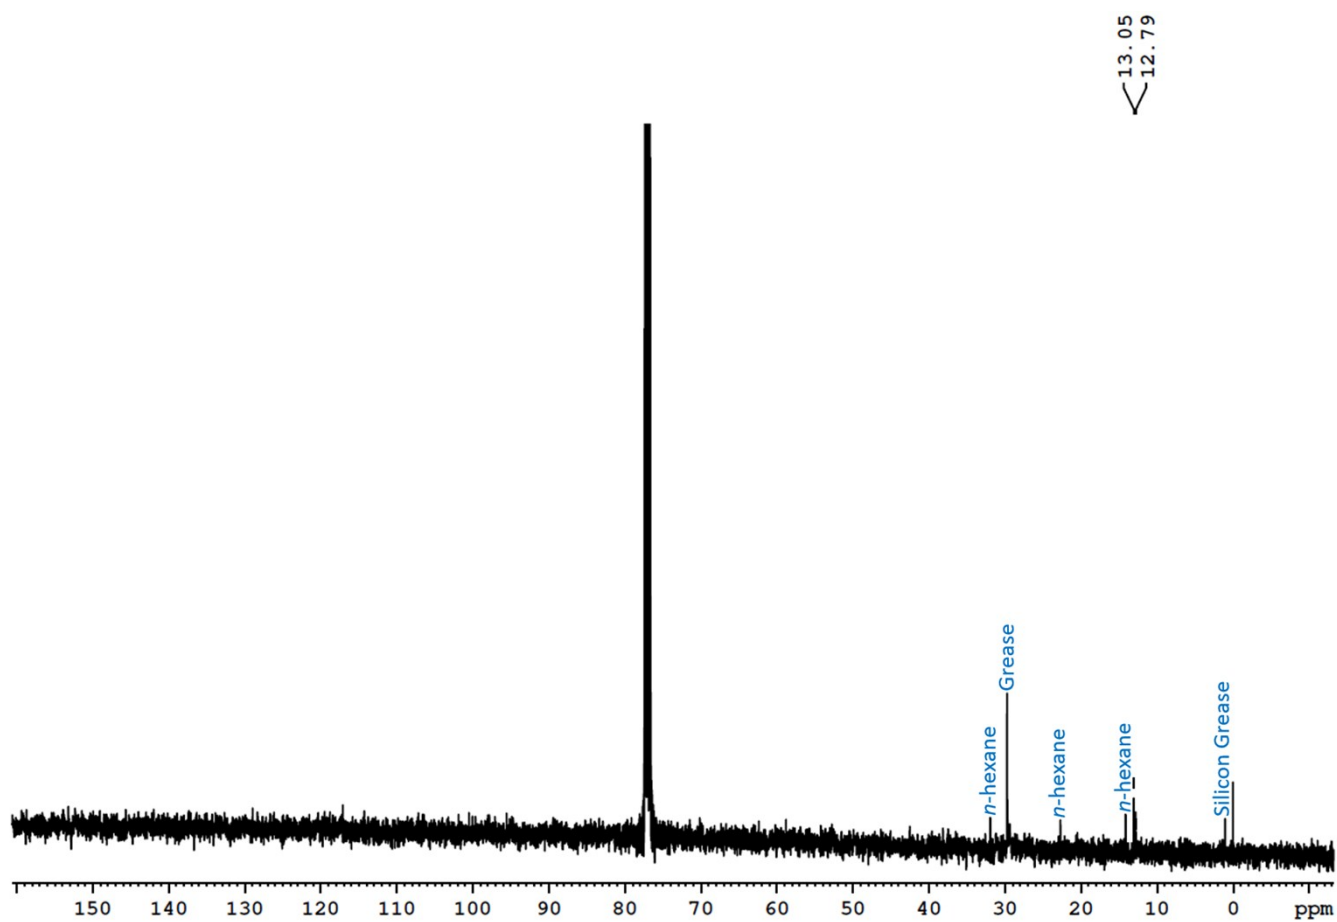

**Figure S13.**  $^{13}\text{C}\{^1\text{H}\}$  NMR spectrum of compound **2** in  $\text{CDCl}_3$  (due to less yield of **2** tertiary carbon peak of  $\text{Cp}^*$  are not visible in spectrum )

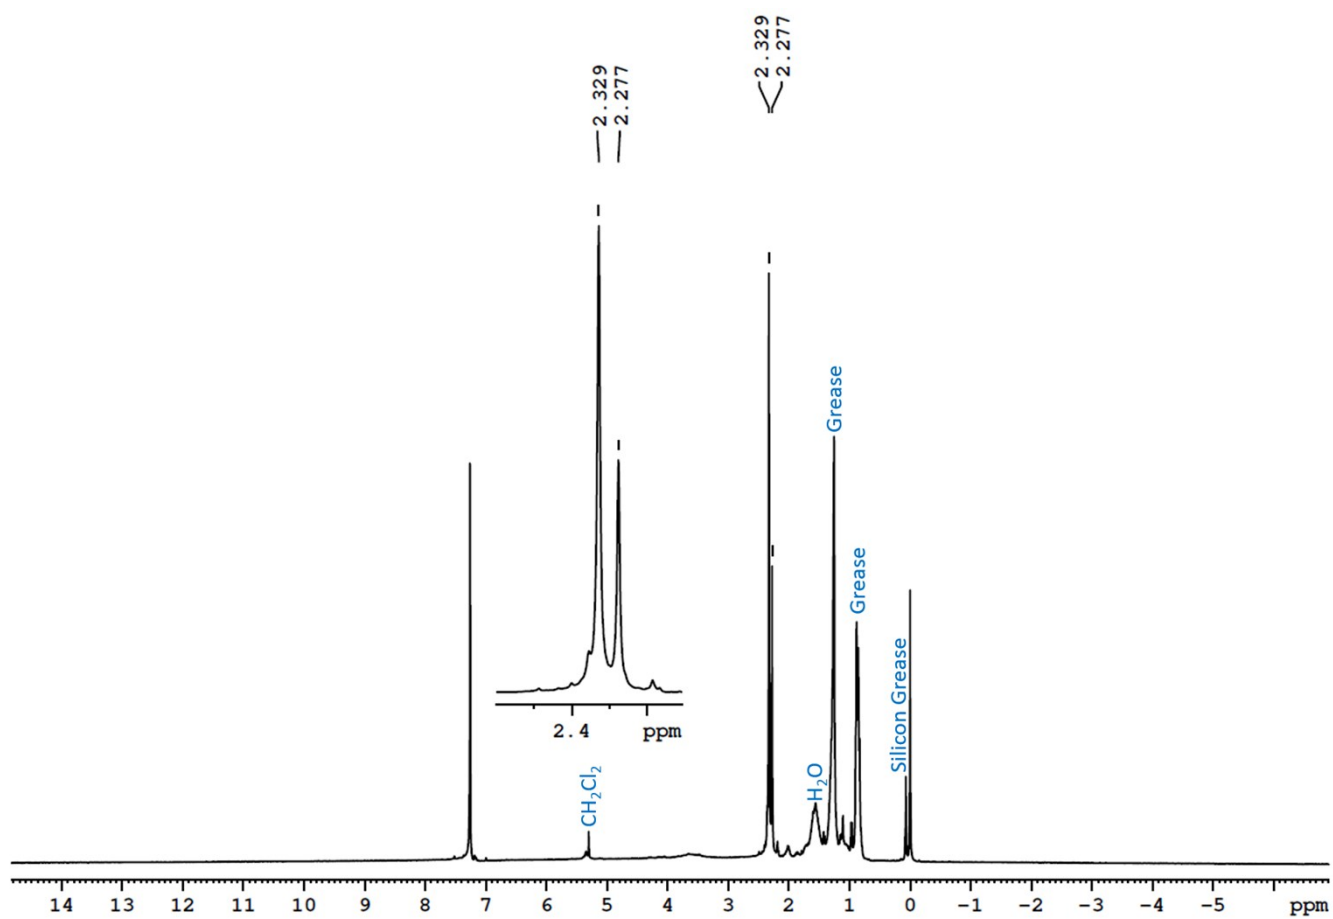

**Figure S14.**  $^1\text{H}$  NMR spectrum of compound **3** in  $\text{CDCl}_3$



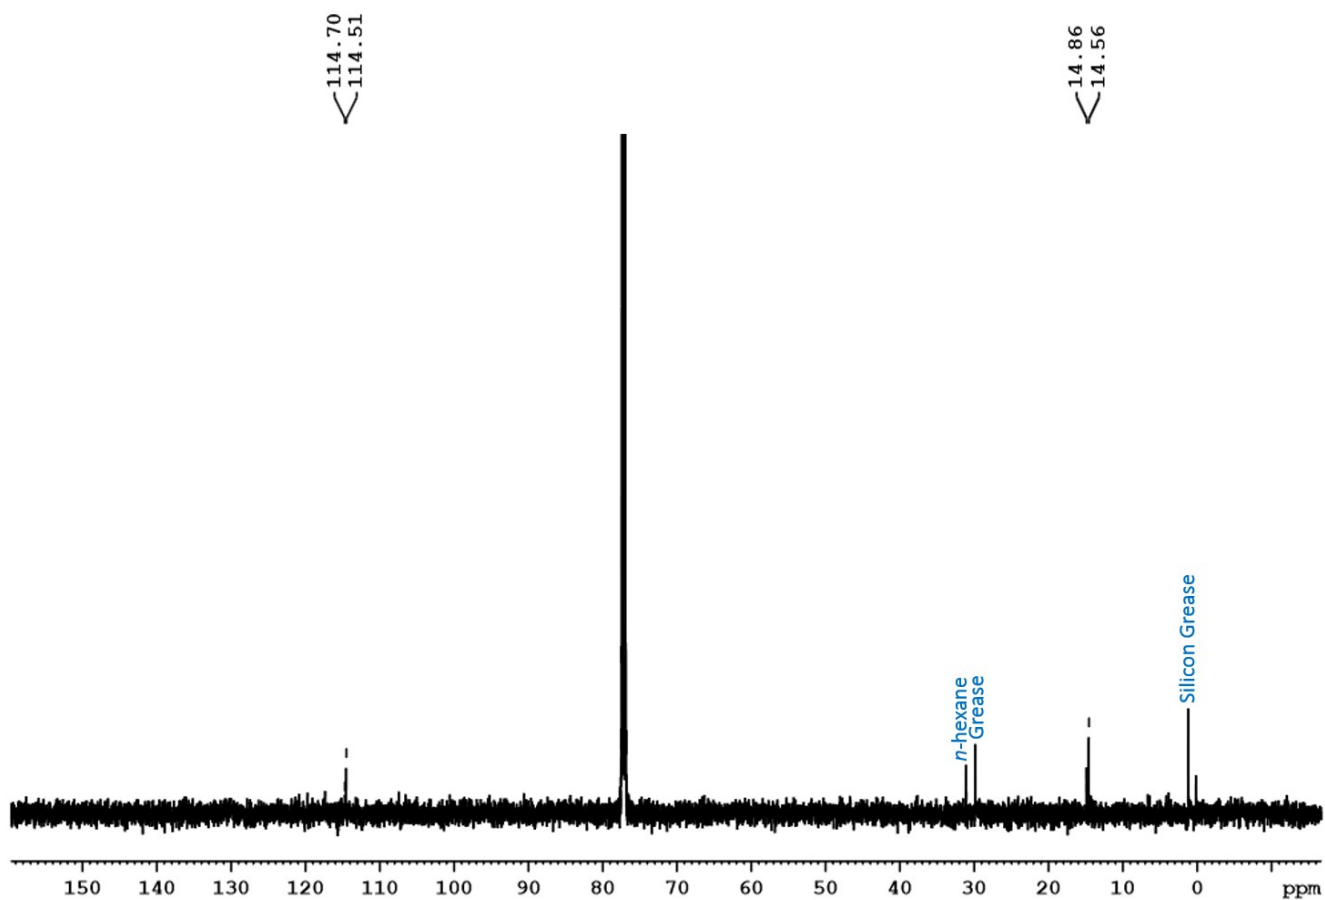

Figure S15.  $^{13}\text{C}\{^1\text{H}\}$  NMR spectrum of compound **3** in  $\text{CDCl}_3$

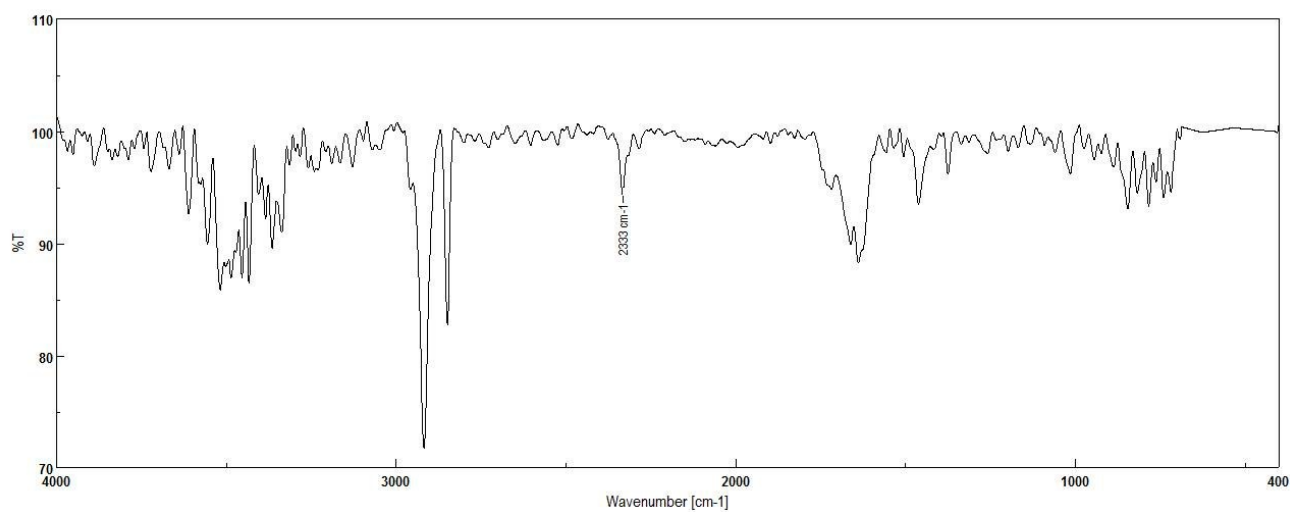

Figure S16. IR spectrum of compound **1**

## II Computational

### Supplementary data

**Table S1.** Calculated natural charges ( $q_M$ ,  $q_E$ , and  $q_B$ ), natural valence population (**Pop**) and HOMO – LUMO gaps of **1**, **2**, **2<sup>Se</sup>**, **4<sup>s</sup>**, **4**, and **3**. The transition metal and chalcogen atoms are indicated by **M** and **E** respectively.

|                       | $q_M$  | $q_E$  | $q_B$  | Pop( $M_{val}$ ) | Pop( $E_{val}$ ) | Pop( $B_{val}$ ) | $\Delta E_{H-L}$ (ev) |
|-----------------------|--------|--------|--------|------------------|------------------|------------------|-----------------------|
| <b>1</b>              | -0.545 | 0.173  | -0.290 | 5.465            | 5.784            | 3.262            | 2.61                  |
|                       | -0.522 | 0.195  |        | 5.437            | 5.767            |                  |                       |
|                       |        | 0.243  |        |                  | 5.706            |                  |                       |
|                       |        | -0.041 |        |                  | 5.994            |                  |                       |
| <b>2</b>              | -0.553 | 0.115  | --     | 5.474            | 5.844            | --               | 2.60                  |
|                       | -0.531 | 0.250  |        | 5.434            | 5.698            |                  |                       |
|                       |        | 0.166  |        |                  | 5.790            |                  |                       |
|                       |        | 0.071  |        |                  | 5.888            |                  |                       |
| <b>2<sup>Se</sup></b> | -0.877 | 0.288  | --     | 5.797            | 5.677            | --               | 2.08                  |
|                       | -0.833 | 0.281  |        | 5.763            | 5.685            |                  |                       |
|                       |        | 0.351  |        |                  | 5.606            |                  |                       |
|                       |        | 0.356  |        |                  | 5.600            |                  |                       |
| <b>4<sup>s</sup></b>  | -0.002 | -0.113 | --     | 4.898            | 6.075            | --               | 2.23                  |
|                       | -0.138 | 0.026  |        | 5.058            | 5.934            |                  |                       |
|                       |        | 0.173  |        |                  | 5.754            |                  |                       |
|                       |        | -0.117 |        |                  | 6.086            |                  |                       |
| <b>4</b>              | -0.481 | 0.141  | -      | 5.375            | 5.822            | --               | 2.45                  |
|                       | -0.454 | 0.148  |        | 5.352            | 5.814            |                  |                       |
|                       |        | 0.269  |        |                  | 5.682            |                  |                       |
|                       |        | 0.267  |        |                  | 5.684            |                  |                       |
| <b>3</b>              | -0.505 | 0.279  | --     | 5.403            | 5.674            | --               | 2.35                  |
|                       | -0.467 | 0.174  |        | 5.356            | 5.782            |                  |                       |
|                       |        | 0.177  |        |                  | 5.783            |                  |                       |
|                       |        | -0.073 |        |                  | 6.039            |                  |                       |

**Table S2.** Selected Wiberg bond index (WBI) of **1**

|     | Nb1    | Nb2    | Nb1    |
|-----|--------|--------|--------|
| Nb1 | 0.0000 | 0.3886 | 0.4332 |
| Nb2 | 0.3886 | 0.0000 | 0.4323 |
| Nb1 | 0.4332 | 0.4323 | 0.0000 |

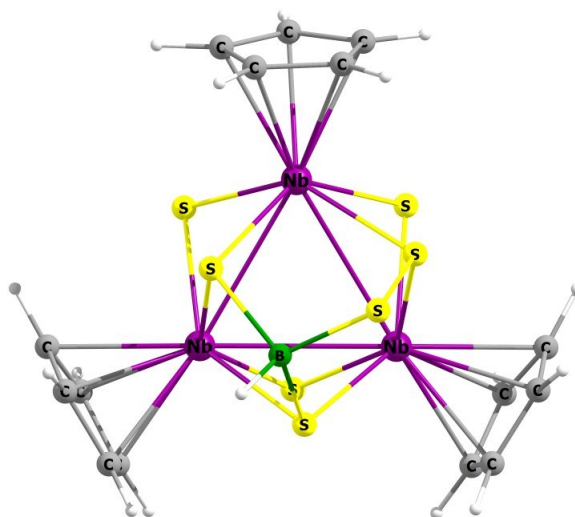

**Figure S17.** Optimized geometry of **1**

Total energy = -3565.42502489 a.u.

Cartesian coordinates for the calculated structure **1** (in Å)

|    |             |             |             |    |             |             |             |            |
|----|-------------|-------------|-------------|----|-------------|-------------|-------------|------------|
| S  | 0.07277200  | 1.49719700  | 3.17134500  | C  | -0.20285900 | -4.14118200 | -1.12632000 |            |
| B  | -0.01535500 | -0.32635200 | 2.75392600  | C  | -1.34199300 | -4.02419500 | -0.29205200 |            |
| C  | 3.29437300  | 2.43198900  | 0.45207500  | C  | -0.89788200 | -3.92204400 | 1.04604400  |            |
| C  | 3.91160900  | 1.16531400  | 0.60454200  | Nb | -0.09163700 | -1.89424000 | -0.11931300 |            |
| C  | 4.10584100  | 0.61783400  | -0.68364600 | S  | -1.82701300 | -1.13221000 | -1.57225900 |            |
| C  | 3.60287400  | 1.54093700  | -1.63475300 | H  | 1.96684200  | -4.20784800 | -0.63099200 |            |
| C  | 3.11265300  | 2.66651600  | -0.93083800 | H  | -0.20916000 | -4.22478600 | -2.20079500 |            |
| C  | -3.43131700 | 1.89226000  | -1.63576700 | H  | -2.36671100 | -3.99718100 | -0.62173200 |            |
| C  | -2.83723900 | 2.95843500  | -0.91954800 | H  | -1.52360600 | -3.81016000 | 1.91533900  |            |
| C  | -3.04761000 | 2.73066700  | 0.46046800  | H  | 1.15665200  | -3.94053900 | 1.90965300  |            |
| Nb | 1.66068100  | 0.74319300  | -0.33941600 | H  | 4.54341600  | -0.34095500 | -0.90423600 |            |
| Nb | -1.58159900 | 0.89916500  | -0.33926700 | H  | 4.17779600  | 0.70121700  | 1.53909300  |            |
| S  | 0.09093400  | 1.88945000  | -1.75039100 | H  | 3.01160100  | 3.09597800  | 1.25142000  |            |
| S  | 0.10305700  | 2.13431500  | 1.18665400  | H  | 2.65965200  | 3.53947400  | -1.36929700 |            |
| S  | 1.47748200  | -0.84607500 | 1.62068800  | H  | 3.59633200  | 1.40827900  | -2.70446600 |            |
| S  | 1.70938700  | -1.30235000 | -1.57216000 | H  | -2.29925600 | 3.78687100  | -1.34816100 |            |
| S  | -1.55203500 | -0.69970000 | 1.62121400  | H  | -2.70536100 | 3.35679200  | 1.26712000  |            |
| C  | -4.02638300 | 1.01421400  | -0.69525700 | H  | -3.43234800 | 1.76894500  | -2.70660800 |            |
| C  | -3.78619400 | 1.52897200  | 0.59872000  | H  | -4.55420400 | 0.10461100  | -0.92651000 |            |
| C  | 0.51935000  | -3.99071900 | 1.04307600  | H  | -4.10054900 | 1.08453100  | 1.52791100  |            |
| C  | 0.94576400  | -4.13515600 | -0.29695100 | H  |             | -0.04882400 | -1.01936300 | 3.73028100 |

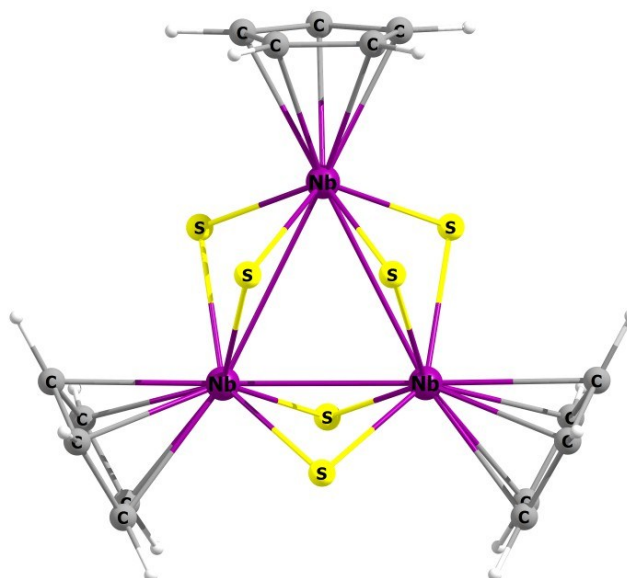

**Figure S18.** Optimized geometry of **2**

Total energy = -3141.65688904 a.u.

Cartesian coordinates for the calculated structure **2** (in Å)

|    |             |             |             |    |             |             |             |
|----|-------------|-------------|-------------|----|-------------|-------------|-------------|
| C  | 2.89017300  | 2.92209300  | 0.65898700  | C  | 1.70749100  | -3.57291800 | -1.20239000 |
| C  | 1.70879200  | 3.57517800  | 1.08992000  | S  | -1.10873900 | -1.83340400 | -1.28074100 |
| C  | 0.99242100  | 3.98134800  | -0.06041400 | S  | -0.88598800 | -1.05219900 | 1.88257400  |
| C  | 1.71874900  | 3.56812700  | -1.20177000 | Nb | 1.01561700  | -1.48358600 | -0.05505400 |
| C  | 2.89488100  | 2.91544500  | -0.75680900 | H  | 0.02440000  | -4.48974100 | -0.07618000 |
| S  | 1.78204800  | -0.00417600 | -1.77698400 | H  | 1.41461000  | -3.71442900 | -2.22961200 |
| S  | 2.10041100  | -0.00338000 | 1.51601200  | H  | 1.39084300  | -3.74192500 | 2.11289200  |
| Nb | 1.02149800  | 1.48029200  | -0.05480400 | H  | 3.63312400  | -2.51815600 | 1.30378300  |
| C  | -4.12037700 | 1.12934000  | -0.53055200 | H  | 3.65312000  | -2.50299400 | -1.37793100 |
| C  | -4.13062900 | 0.77284800  | 0.83504400  | H  | -4.12929400 | -1.22317100 | 1.82788400  |
| C  | -4.13260700 | -0.64454100 | 0.91909800  | H  | -4.10888900 | -2.20104700 | -0.66782300 |
| C  | -4.12343800 | -1.15975400 | -0.39494300 | H  | -4.06993900 | -0.12846700 | -2.36988900 |
| C  | -4.09960100 | -0.06434200 | -1.29420200 | H  | -4.10513200 | 2.13124700  | -0.92386700 |
| S  | -1.09866100 | 1.83698900  | -1.28224900 | H  | -4.12381500 | 1.45451000  | 1.66928800  |
| S  | -0.88353300 | 1.05706800  | 1.88317400  | H  | 0.04298500  | 4.49014200  | -0.06886700 |
| Nb | -1.95533700 | 0.00385000  | -0.08653800 | H  | 1.41345100  | 3.73362700  | 2.11476300  |
| C  | 0.97576600  | -3.98468100 | -0.06393200 | H  | 3.64807700  | 2.50180900  | 1.29666700  |
| C  | 1.69006800  | -3.58310100 | 1.08922900  | H  | 3.65921600  | 2.49013300  | -1.38511800 |
| C  | 2.87550000  | -2.93427100 | 0.66304100  | H  | 1.42306700  | 3.71211300  | -2.22783700 |
| C  | 2.88492400  | -2.92591000 | -0.75271900 |    |             |             |             |

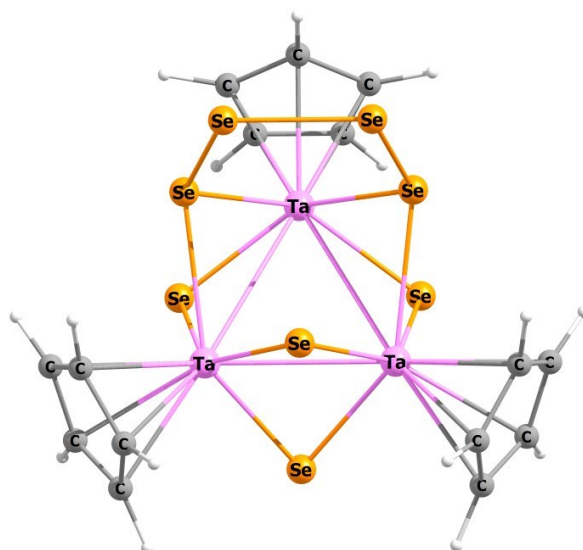

**Figure S19.** Optimized geometry of **3**

Total energy = -19965.21468030 a.u.

Cartesian coordinates for the calculated structure **3** (in Å)

|    |             |             |             |    |             |             |             |
|----|-------------|-------------|-------------|----|-------------|-------------|-------------|
| C  | -1.52932300 | -1.56850100 | 3.53610900  | C  | 0.59507000  | -2.42628700 | -3.64410900 |
| C  | -0.22318300 | -1.33674300 | 4.02858100  | C  | -0.20674100 | -3.33597500 | -2.91544300 |
| C  | 0.59507000  | -2.42628700 | 3.64410900  | C  | -1.52035000 | -2.80634700 | -2.84840200 |
| C  | -0.20674100 | -3.33597500 | 2.91544300  | Se | 2.09822500  | 0.11922600  | -1.95325700 |
| C  | -1.52035000 | -2.80634700 | 2.84840200  | Ta | -0.08594600 | -1.28293700 | -1.54072300 |
| C  | 1.22342400  | 3.95832100  | 0.00000000  | H  | 3.93442600  | 2.56217200  | 1.34151700  |
| C  | 1.96748600  | 3.58286500  | -1.14475100 | H  | 1.66289600  | 3.71670100  | 2.16876400  |
| C  | 3.16246700  | 2.96481300  | -0.70796200 | H  | 0.25550700  | 4.43384500  | 0.00000000  |
| Se | 2.09822500  | 0.11922600  | 1.95325700  | H  | 1.66289600  | 3.71670100  | -2.16876400 |
| Se | -0.64099900 | 1.43463200  | 1.84805700  | H  | 3.93442600  | 2.56217200  | -1.34151700 |
| Se | -2.80014100 | 2.26283900  | 1.20358600  | H  | 1.64471400  | -2.53860700 | -3.85925100 |
| Se | 1.21230900  | -2.83857600 | 0.00000000  | H  | 0.11847700  | -4.27144100 | -2.49436300 |
| Se | -2.11065800 | -1.27660900 | 0.00000000  | H  | -2.36364200 | -3.26685200 | -2.36334700 |
| Ta | 1.29365600  | 1.49303800  | 0.00000000  | H  | -2.37952800 | -0.91667800 | -3.65313200 |
| Ta | -0.08594600 | -1.28293700 | 1.54072300  | H  | 0.09868800  | -0.47115600 | -4.58346500 |
| C  | 1.96748600  | 3.58286500  | 1.14475100  | H  | -2.37952800 | -0.91667800 | 3.65313200  |
| C  | 3.16246700  | 2.96481300  | 0.70796200  | H  | -2.36364200 | -3.26685200 | 2.36334700  |
| Se | -0.64099900 | 1.43463200  | -1.84805700 | H  | 0.11847700  | -4.27144100 | 2.49436300  |
| Se | -2.80014100 | 2.26283900  | -1.20358600 | H  | 1.64471400  | -2.53860700 | 3.85925100  |
| C  | -1.52932300 | -1.56850100 | -3.53610900 | H  | 0.09868800  | -0.47115600 | 4.58346500  |
| C  | -0.22318300 | -1.33674300 | -4.02858100 |    |             |             |             |

### Notes and references:

- 1 Due to poor data quality, hydrogens on methyl units not located and bond distances and angles are not provided.
- 2  $^{11}\text{B}\{^1\text{H}\}$  spectra were processed with a backward linear prediction algorithm to remove the broad  $^{11}\text{B}$  background signal of the NMR tube. For references see (a) J. J. Led and H. Gesmar, *Chem. Rev.*, 1991, **91**, 1413–1426; (b) L. Yang, R. Simionescu, A. Lough and H. Yan, *Dyes Pigm.*, 2011, **91**, 264–267; (c) R. Weiss and R. N. Grimes, *J. Am. Chem. Soc.*, 1978, **100**, 1401–1405.
